# Supplementary material
Source: publisher figshare collection journal article supplement (https://future-science-group.figshare.com/ndownloader/files/28049076)
Supplement: Supplementary file 1 [file 28049076]

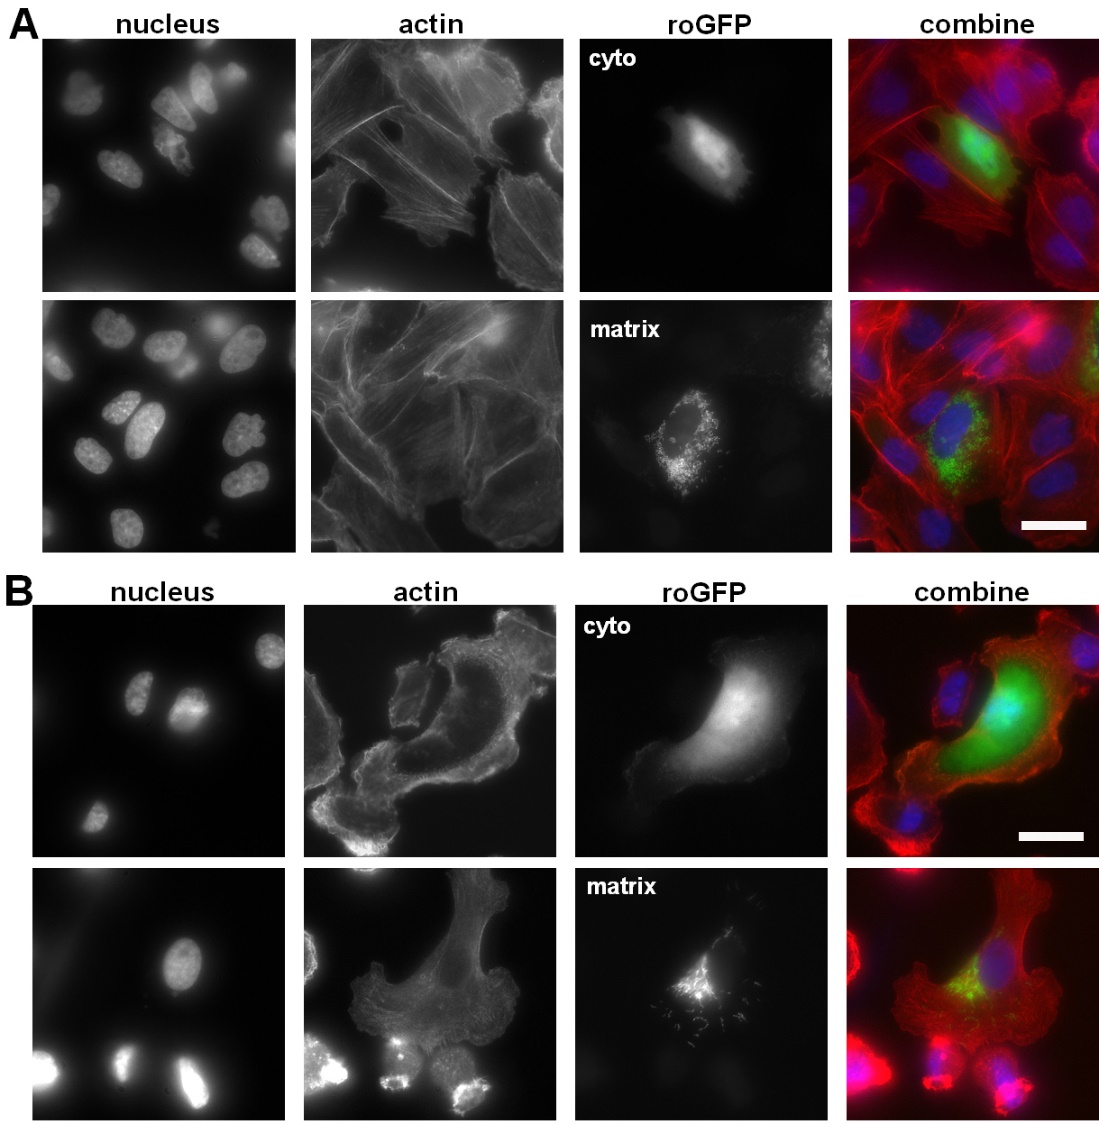


Figure S1. Localization of cyto-roGFP and matrix-roGFP in CHO and MDA-MB-231 cells. CHO (A) and MDA-MB-231 (B) cells expressing cyto-roGFP or matrix-roGFP were trypsinized and plated onto Fn-coated coverslips, fixed, and then stained for visualization of the nucleus and actin. Representative images are shown. Scale bar = 20 μm
